# Supplementary material for: Asymptotic Properties of Conditional Value-at-risk Estimate for Asymptotic Negatively Associated Samples
Source: Research Square preprint supplement (doi:10.21203/rs.3.rs-4419778/v1), 2024-05-24
Supplement: Supplementary file 1 [file 066bcc28dd533a59ab4bb532.xlsx]

## Sheet: Sheet1
	hongta	Central China
2021-05-06	12.59	4.42
2021-05-07	12.3	4.38
2021-05-10	12.4	4.4
2021-05-11	12.51	4.46
2021-05-12	12.46	4.45
2021-05-13	12.44	4.45
2021-05-14	13.16	4.7
2021-05-17	12.88	4.59
2021-05-18	12.94	4.69
2021-05-19	12.87	4.7
2021-05-20	13.12	4.91
2021-05-21	12.86	4.77
2021-05-24	13.03	4.74
2021-05-25	13.39	4.89
2021-05-26	13.35	4.87
2021-05-27	13.5	4.87
2021-05-28	13.52	5.1
2021-05-31	13.4	5.06
2021-06-01	13.24	5.34
2021-06-02	13.05	5.07
2021-06-03	13.04	5.02
2021-06-04	13.03	4.97
2021-06-07	13.09	4.96
2021-06-08	13.09	4.99
2021-06-09	12.86	4.89
2021-06-10	12.74	4.99
2021-06-11	12.62	4.84
2021-06-15	12.36	4.71
2021-06-16	12.46	4.75
2021-06-17	12.52	4.75
2021-06-18	12.53	4.81
2021-06-21	13.19	4.77
2021-06-22	13.01	4.73
2021-06-23	13	4.75
2021-06-24	13.27	4.79
2021-06-25	13.75	4.95
2021-06-28	13.56	4.88
2021-06-29	13.58	4.82
2021-06-30	13.56	4.87
2021-07-01	12.9	4.71
2021-07-02	12.61	4.52
2021-07-05	12.62	4.57
2021-07-06	12.61	4.59
2021-07-07	13.2	4.58
2021-07-08	13.34	4.54
2021-07-09	13.3	4.56
2021-07-12	13.41	4.63
2021-07-13	13.49	4.5
2021-07-14	13.24	4.52
2021-07-15	13.46	4.51
2021-07-16	13.22	4.49
2021-07-19	12.9	4.62
2021-07-20	12.86	4.74
2021-07-21	14.15	4.71
2021-07-22	13.88	4.81
2021-07-23	14.18	4.92
2021-07-26	13.36	4.8
2021-07-27	12.52	4.76
2021-07-28	12.07	4.63
2021-07-29	12.13	4.8
2021-07-30	12.49	4.46
2021-08-02	13.74	4.52
2021-08-03	13.54	4.7
2021-08-04	13.26	4.69
2021-08-05	13.14	4.57
2021-08-06	13.37	4.54
2021-08-09	13.26	4.63
2021-08-10	14.3	4.69
2021-08-11	13.61	4.65
2021-08-12	13.51	4.6
2021-08-13	13.13	4.57
2021-08-16	13.16	4.64
2021-08-17	12.65	4.62
2021-08-18	12.69	4.89
2021-08-19	12.38	4.95
2021-08-20	12.5	4.96
2021-08-23	12.7	4.91
2021-08-24	12.9	4.91
2021-08-25	12.94	4.85
2021-08-26	12.75	4.85
2021-08-27	12.85	4.87
2021-08-30	12.92	4.78
2021-08-31	13.03	4.88
2021-09-01	12.83	4.99
2021-09-02	12.89	5.1
2021-09-03	12.53	5.06
2021-09-06	12.3	5.22
2021-09-07	12.38	5.22
2021-09-08	12.22	5.28
2021-09-09	12.18	5.22
2021-09-10	12.36	5.19
2021-09-13	12.36	5.24
2021-09-14	12.23	5.12
2021-09-15	11.88	5.42
2021-09-16	11.94	5.17
2021-09-17	11.75	5.09
2021-09-22	11.8	5.12
2021-09-23	11.9	5.16
2021-09-24	11.93	5.03
2021-09-27	11.79	4.85
2021-09-28	12	4.9
2021-09-29	12.14	4.82
2021-09-30	11.97	4.81
2021-10-08	11.86	4.86
2021-10-11	11.9	4.86
2021-10-12	11.83	4.76
2021-10-13	11.77	4.78
2021-10-14	11.75	4.76
2021-10-15	11.41	4.68
2021-10-18	11.22	4.71
2021-10-19	11.01	4.74
2021-10-20	11.02	4.72
2021-10-21	11.21	4.74
2021-10-22	11.26	4.72
2021-10-25	11.08	4.76
2021-10-26	11.24	4.73
2021-10-27	11.27	4.62
2021-10-28	11.19	4.53
2021-10-29	11.26	4.59
2021-11-01	11.27	4.72
2021-11-02	11.25	4.62
2021-11-03	11.39	4.63
2021-11-04	11.32	4.64
2021-11-05	11.34	4.59
2021-11-08	11.25	4.64
2021-11-09	11.24	4.67
2021-11-10	11.09	4.68
2021-11-11	11.25	4.75
2021-11-12	11.33	4.73
2021-11-15	11.38	4.7
2021-11-16	11.32	4.65
2021-11-17	11.28	4.64
2021-11-18	11.28	4.62
2021-11-19	11.17	4.71
2021-11-22	11.18	4.7
2021-11-23	11.33	4.73
2021-11-24	11.38	4.71
2021-11-25	11.39	4.68
2021-11-26	11.39	4.67
2021-11-29	11.35	4.63
2021-11-30	11.54	4.65
2021-12-01	11.75	4.71
2021-12-02	11.62	4.7
2021-12-03	11.53	4.74
2021-12-06	11.45	4.76
2021-12-07	11.54	4.77
2021-12-08	11.62	4.83
2021-12-09	11.53	4.89
2021-12-10	11.39	4.85
2021-12-13	11.55	4.83
2021-12-14	11.5	4.8
2021-12-15	11.45	4.81
2021-12-16	11.24	4.85
2021-12-17	11.28	4.85
2021-12-20	12.41	4.78
2021-12-21	11.91	4.92
2021-12-22	11.92	4.88
2021-12-23	11.92	4.83
2021-12-24	12	4.8
2021-12-27	12.19	4.81
2021-12-28	12.11	4.87
2021-12-29	11.93	4.85
2021-12-30	11.58	4.89
2021-12-31	11.58	4.91
2022-01-04	11.6	4.97
2022-01-05	11.51	4.92
2022-01-06	11.55	4.87
2022-01-07	11.43	4.85
2022-01-10	11.52	4.93
2022-01-11	11.52	5.13
2022-01-12	11.71	5.08
2022-01-13	11.55	5.11
2022-01-14	11.37	4.96
2022-01-17	10.81	5
2022-01-18	10.99	5.17
2022-01-19	10.58	5.42
2022-01-20	10.63	5.32
2022-01-21	10.73	5.35
2022-01-24	10.89	5.17
2022-01-25	10.95	5.01
2022-01-26	10.88	5.34
2022-01-27	10.88	5.15
2022-01-28	10.64	5.04
2022-02-07	10.68	5.08
2022-02-08	10.74	5.28
2022-02-09	10.64	5.26
2022-02-10	10.65	5.4
2022-02-11	10.74	5.3
2022-02-14	10.67	5.16
2022-02-15	10.73	5.19
2022-02-16	10.24	5.17
2022-02-17	10.21	5.02
2022-02-18	9.79	5.07
2022-02-21	9.8	5.09
2022-02-22	9.79	4.99
2022-02-23	9.82	5.05
2022-02-24	9.71	4.78
2022-02-25	9.62	4.77
2022-02-28	9.4	4.78
2022-03-01	9.01	4.81
2022-03-02	8.94	4.78
2022-03-03	9.29	4.79
2022-03-04	9.13	4.68
2022-03-07	8.95	4.67
2022-03-08	9.46	4.61
2022-03-09	9.4	4.54
2022-03-10	9.42	4.55
2022-03-11	9.28	4.69
2022-03-14	9.25	4.62
2022-03-15	9.3	4.48
2022-03-16	9.18	4.7
2022-03-17	9.59	4.68
2022-03-18	9.35	4.69
2022-03-21	9.71	4.65
2022-03-22	10.68	4.63
2022-03-23	10.38	4.61
2022-03-24	10.45	4.54
2022-03-25	10.2	4.56
2022-03-28	9.97	4.6
2022-03-29	10.21	4.55
2022-03-30	9.79	4.67
2022-04-12	10.77	4.63
2022-04-13	10.83	4.67
2022-04-14	10.98	4.69
2022-04-15	10.88	4.59
2022-04-18	10.38	4.64
2022-04-19	10.44	4.52
2022-04-20	10.49	4.64
2022-04-21	10.89	4.57
2022-04-22	10.51	4.63
2022-04-25	10.43	4.58
2022-04-26	9.39	4.5
2022-04-27	9.08	4.49
2022-04-28	8.6	4.42
2022-04-29	9.04	4.34
2022-05-05	8.14	4.32
2022-05-06	7.85	4.1
2022-05-09	7.85	3.89
2022-05-10	7.93	3.95
2022-05-11	7.88	3.81
2022-05-12	7.84	3.96
2022-05-13	7.8	3.89
2022-05-16	7.98	3.81
2022-05-17	7.89	3.82
2022-05-18	7.87	3.86
2022-05-19	7.82	3.85
2022-05-20	7.96	3.85
2022-05-23	8.16	3.87
2022-05-24	7.83	3.86
2022-05-25	7.86	3.85
2022-05-26	7.95	3.86
2022-05-27	7.88	3.85
2022-05-30	7.88	3.91
2022-05-31	7.91	3.94
2022-06-01	7.88	3.82
2022-06-02	7.96	3.85
2022-06-06	8.12	3.92
2022-06-07	8.1	3.9
2022-06-08	8.21	3.89
2022-06-09	8.22	3.93
2022-06-10	8.37	3.91
2022-06-13	8.28	3.95
2022-06-14	9.11	4
2022-06-15	10.02	3.98
2022-06-16	9.34	4.09
2022-06-17	10.27	4.09
2022-06-20	10.18	4.16
2022-06-21	9.94	4.1
2022-06-22	9.46	4.26
2022-06-23	9.51	4.42
2022-06-24	9.41	4.25
2022-06-27	9.34	4.23
2022-06-28	9.4	4.17
2022-06-29	9.11	4.15
2022-06-30	9.13	4.08
2022-07-01	9.19	4.18
2022-07-04	9.34	4.18
2022-07-05	9.15	4.17
2022-07-06	9.19	4.22
2022-07-07	9.06	4.16
2022-07-08	8.97	4.17
2022-07-11	8.97	4.12
2022-07-12	9.04	4.14
2022-07-13	8.97	4.09
2022-07-14	8.8	4.06
2022-07-15	8.94	4.06
2022-07-18	9.04	4.07
2022-07-19	9.24	4.03
2022-07-20	9.18	4.04
2022-07-21	9.22	4.04
2022-07-22	9.16	4.04
2022-07-25	8.45	3.78
2022-07-26	8.52	3.85
2022-07-27	8.74	3.9
2022-07-28	8.93	3.9
2022-07-29	8.82	3.87
2022-08-01	8.88	3.87
2022-08-02	8.51	3.86
2022-08-03	8.35	3.88
2022-08-04	8.56	3.87
2022-08-05	8.71	3.9
2022-08-08	8.58	3.89
2022-08-09	8.43	3.88
2022-08-10	8.36	3.72
2022-08-11	8.9	3.68
2022-08-12	8.79	3.71
2022-08-15	8.53	3.78
2022-08-16	8.54	3.79
2022-08-17	8.7	3.77
2022-08-18	8.95	3.78
2022-08-19	8.83	3.96
2022-08-22	8.72	3.98
2022-08-23	8.8	3.94
2022-08-24	8.53	3.94
2022-08-25	8.63	4
2022-08-26	8.49	3.99
2022-08-29	8.41	3.97
2022-08-30	8.43	3.93
2022-08-31	8.46	3.95
2022-09-01	8.32	3.89
2022-09-02	8.27	3.96
2022-09-05	8.36	3.9
2022-09-06	8.51	3.89
2022-09-07	8.44	3.93
2022-09-08	8.36	3.91
2022-09-09	8.46	3.85
2022-09-13	8.45	3.86
2022-09-14	8.35	3.91
2022-09-15	8.26	3.94
2022-09-16	7.76	3.9
2022-09-19	7.67	3.9
2022-09-20	7.71	3.94
2022-09-21	7.74	3.92
2022-09-22	7.74	3.87
2022-09-23	7.63	3.84
2022-09-26	7.47	3.69
2022-09-27	7.6	3.66
2022-09-28	7.51	3.67
2022-09-29	7.37	3.69
2022-09-30	7.32	3.69
2022-10-10	7.19	3.69
2022-10-11	7.29	3.59
2022-10-12	7.44	3.64
2022-10-13	7.47	3.55
2022-10-14	7.55	3.48
2022-10-17	7.63	3.49
2022-10-18	7.58	3.43
2022-10-19	7.51	3.49
2022-10-20	8.07	3.59
2022-10-21	8.42	3.56
2022-10-24	8.06	3.59
2022-10-25	7.85	3.64
2022-10-26	7.86	3.59
2022-10-27	7.72	3.56
2022-10-28	7.44	3.55
2022-10-31	7.14	3.55
2022-11-01	7.31	3.55
2022-11-02	7.28	3.51
2022-11-03	7.16	3.56
2022-11-04	7.32	3.56
2022-11-07	7.51	3.46
2022-11-08	7.45	3.6
2022-11-09	7.38	3.67
2022-11-10	7.39	3.65
2022-11-11	7.52	3.63
2022-11-14	7.58	3.68
2022-11-15	7.88	3.71
2022-11-16	7.8	3.7
2022-11-17	7.98	3.69
2022-11-18	7.82	3.71
2022-11-21	7.68	3.76
2022-11-22	7.92	3.77
2022-11-23	7.75	3.88
2022-11-24	7.66	3.84
2022-11-25	7.84	3.89
2022-11-28	7.73	3.83
2022-11-29	7.95	3.77
2022-11-30	7.94	3.77
2022-12-01	7.89	3.77
2022-12-02	7.9	3.73
2022-12-05	8.07	3.77
2022-12-06	8.02	3.74
2022-12-07	7.93	3.86
2022-12-08	7.87	3.84
2022-12-09	7.88	3.85
2022-12-12	7.72	3.84
2022-12-13	7.71	3.92
2022-12-14	8.06	3.91
2022-12-15	7.98	3.85
2022-12-16	8.02	3.82
2022-12-19	7.63	3.82
2022-12-20	7.54	3.75
2022-12-21	7.45	3.75
2022-12-22	7.42	3.76
2022-12-23	7.52	3.73
2022-12-26	7.48	3.73
2022-12-27	7.5	3.62
2022-12-28	7.4	3.62
2022-12-29	7.41	3.62
2022-12-30	7.4	3.6
2023-01-03	7.44	3.61
2023-01-04	7.44	3.59
2023-01-05	7.53	3.62
2023-01-06	7.46	3.61
2023-01-09	7.54	3.62
2023-01-10	7.53	3.64
2023-01-11	7.43	3.63
2023-01-12	7.5	3.68
2023-01-13	7.62	3.69
2023-01-16	7.85	3.67
2023-01-17	8.34	3.71
2023-01-18	8.19	3.7
2023-01-19	8.38	3.66
2023-01-20	8.3	3.67
2023-01-30	8.23	3.74
2023-01-31	8.16	3.85
2023-02-01	8.98	3.9
2023-02-02	9.34	3.91
2023-02-03	8.97	3.98
2023-02-06	8.77	3.94
2023-02-07	8.78	3.9
2023-02-08	8.8	3.87
2023-02-09	8.84	3.96
2023-02-10	8.54	3.95
2023-02-13	8.58	3.92
2023-02-14	8.64	3.88
2023-02-15	8.54	3.88
2023-02-16	8.41	3.85
2023-02-17	8.36	3.91
2023-02-20	8.7	3.87
2023-02-21	8.76	3.9
2023-02-22	8.67	3.92
2023-02-23	8.78	3.89
2023-02-24	8.6	3.85
2023-02-27	8.47	3.8
2023-02-28	8.56	3.92
2023-03-01	8.67	3.92
2023-03-02	8.59	3.91
2023-03-03	8.61	3.92
2023-03-06	8.51	3.89
2023-03-07	8.29	3.85
2023-03-08	8.33	3.88
2023-03-09	8.47	3.91
2023-03-10	8.37	3.91
2023-03-13	8.4	3.94
2023-03-14	8.25	3.89
2023-03-15	8.27	3.83
2023-03-16	8.09	3.84
2023-03-17	8.26	3.83
2023-03-20	8.2	3.78
2023-03-21	8.26	3.78
2023-03-22	8.27	3.74
2023-03-23	8.4	3.76
2023-03-24	8.55	3.74
2023-03-27	8.71	3.78
2023-03-28	8.47	3.75
2023-03-29	8.38	3.78
2023-03-30	8.82	3.78
2023-03-31	8.63	3.81
2023-04-03	8.93	3.81
2023-04-04	8.9	3.81
2023-04-06	8.8	3.82
2023-04-07	8.83	3.76
2023-04-10	8.57	3.73
2023-04-11	8.67	3.72
2023-04-12	8.91	3.8
2023-04-13	8.74	3.84
2023-04-14	9.11	3.81
2023-04-17	9.23	3.83
2023-04-18	9.1	3.82
2023-04-19	8.88	3.85
2023-04-20	8.89	3.86
2023-04-21	8.24	3.84
2023-04-24	8.1	3.83
2023-04-25	7.93	3.92
2023-04-26	7.93	3.93
2023-04-27	7.9	3.88
2023-04-28	8.25	3.95
2023-05-04	8.24	3.8
2023-05-05	8.25	3.78
